# Supplementary material for: Stochastic promoter activation affects Nanog expression variability in mouse embryonic stem cells
Source: PubMed Central journal article supplement — Sci Rep. 2014 Nov 20;4:7125. doi: 10.1038/srep07125 (PMC4238020; doi:10.1038/srep07125), 2014-11-20
Supplement: srep07125-s1.pdf [file srep07125-s1.pdf]

**Title**

Stochastic promoter activation affects Nanog expression variability in mouse embryonic stem cells

**Authors**

Hiroshi Ochiai<sup>1</sup> \*, Takeshi Sugawara<sup>1</sup>, Tetsushi Sakuma<sup>2</sup>, Takashi Yamamoto<sup>1,2</sup>

**Affiliations**

<sup>1</sup>Research Center for the Mathematics on Chromatin Live Dynamics (RcMcD), Hiroshima University, Higashi-Hiroshima 739-8530, Japan

<sup>2</sup>Department of Mathematical and Life Sciences, Graduate School of Science, Hiroshima University, Higashi-Hiroshima 739-8526, Japan

\* Corresponding author

Tel.: +81-82-424-5529

Fax: +81-82-424-5529

Hiroshi Ochiai:

E-mail: [ochiai@hiroshima-u.ac.jp](mailto:ochiai@hiroshima-u.ac.jp)

## Supplementary Figures

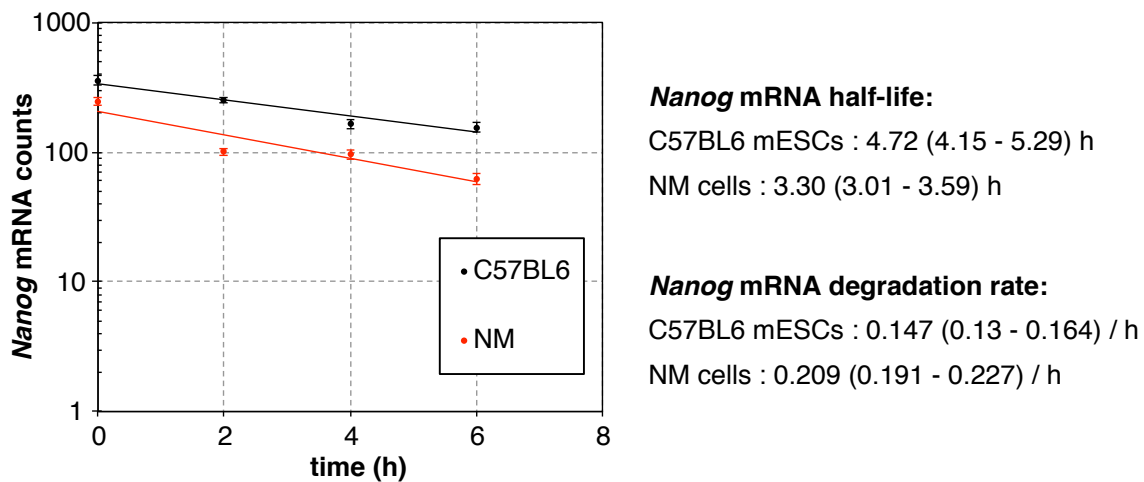

**Supplementary Figure S1, Half-lives of WT and MS2-integrated *Nanog* mRNA.** *Nanog* mRNAs in NM and wild-type (WT) C57BL6 mESCs were counted by smFISH using *Nanog* exonic probes over 6 hours after transcription inhibition with actinomycin D (averages and 95% confidence intervals are shown). Half-lives and degradation rates are shown at the right side of the Figure.  $n > 100$  sample points. 95% confidence limits are in parentheses.

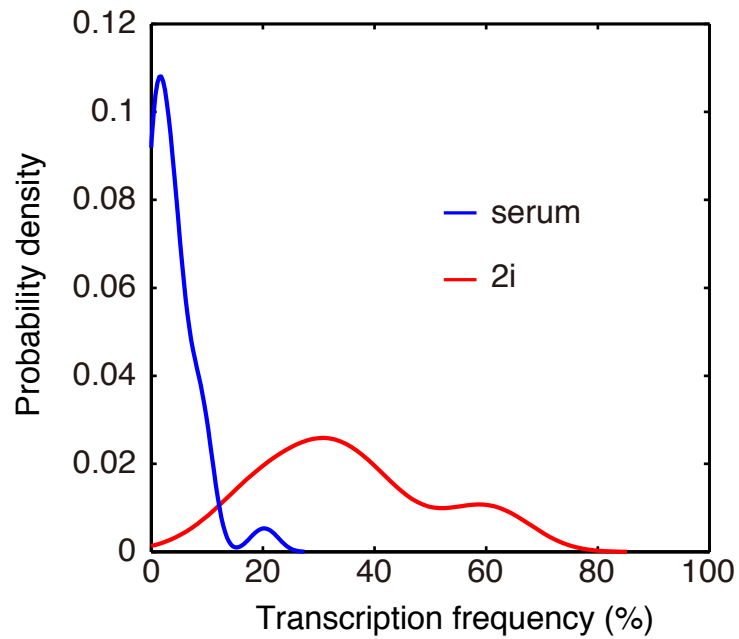

**Supplementary Figure S2, Multimodal distributions of transcription frequency.** Probability density functions of transcription frequency over 4 hours in NM-G cells cultured in serum and 2i conditions (Figure 3c) are shown. Continuous probability density functions were generated using a kernel smoothed density estimate (ksdensity, Matlab).

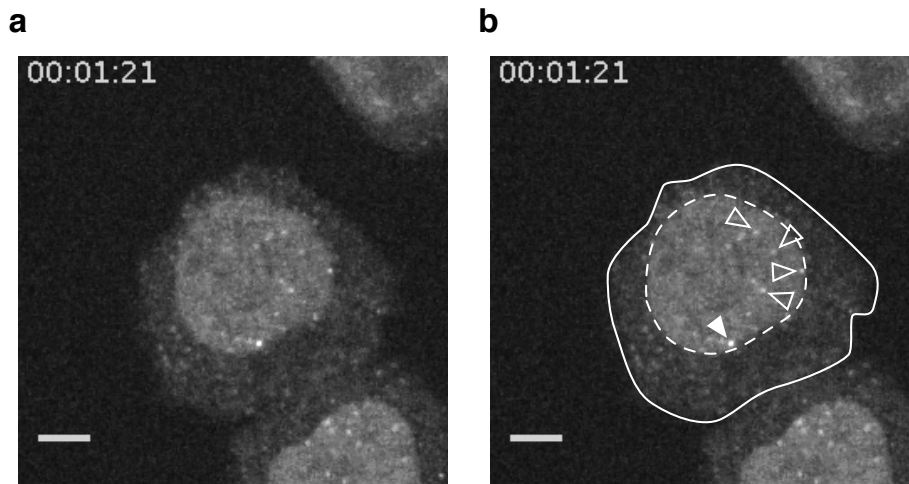

**Supplementary Figure S3, Simultaneous visualization of individual mRNA molecules and transcription site.** (a, b) The images are the same snapshot of live imaging of an NM-G cell with (b) or without (a) annotations (Supplementary Video S3). Solid and dashed lines indicate the edges of cell and nuclear membranes, respectively. Filled and unfilled arrowheads point to a transcription site and individual mRNA spots, respectively. Scale bar, 5  $\mu\text{m}$ .

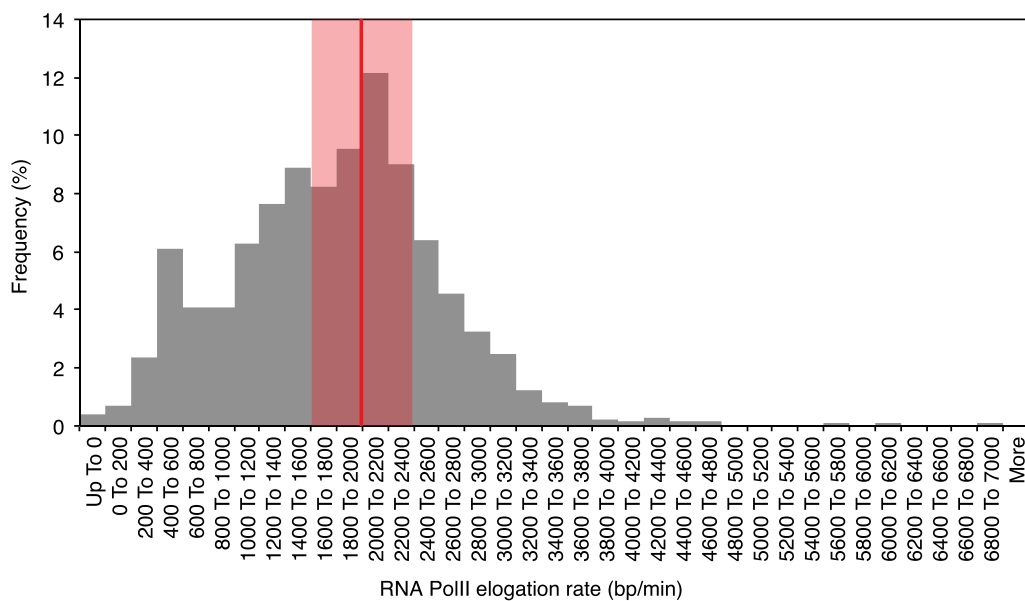

**Supplementary Figure S4, Distribution of RNA Pol II elongation rate.** Histogram shows distribution of RNA Pol II elongation rate in mESCs determined by Jonker et al. (Jonker et al., *eLife*, 2014). Red line and light red rectangle represent the mean (1.99 kb/min) and standard deviation ( $\pm 0.39$  kb/min) of RNA Pol II elongation rate estimated in this study.

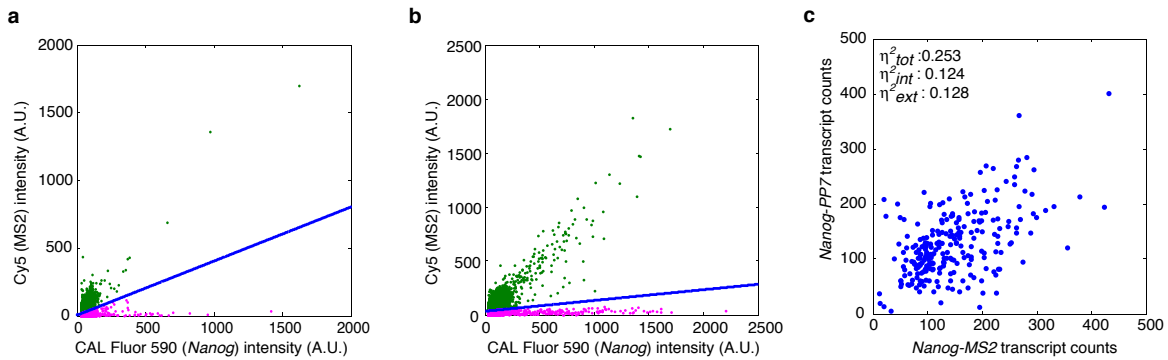

**Supplementary Figure S5, Allele-specific single-molecule fluorescence *in situ* hybridization (smFISH) in a reporter mESC line.** (a, b) smFISH was performed in NMP cells cultured in serum (a) or 2i conditions (b) using *Nanog* exonic probes (CAL Fluor 590 conjugated) and MS2 probes (Cy5 conjugated). The fluorescence intensities of CAL Fluor 590 above the threshold and Cy5 of individual mRNA spots were plotted. Among the *Nanog* probe-positive spots, those with an MS2 probe signal intensity above a given threshold (blue line) were assumed to be mRNAs expressed from an MS2-integrated allele (green dots); otherwise, mRNAs were assumed to be expressed from PP7 alleles (magenta dots). The threshold lines were manually determined to equally separate all dots. (c) Scatter plot of *Nanog-MS2* and *-PP7* transcripts determined by smFISH using MS2 and PP7 probes.

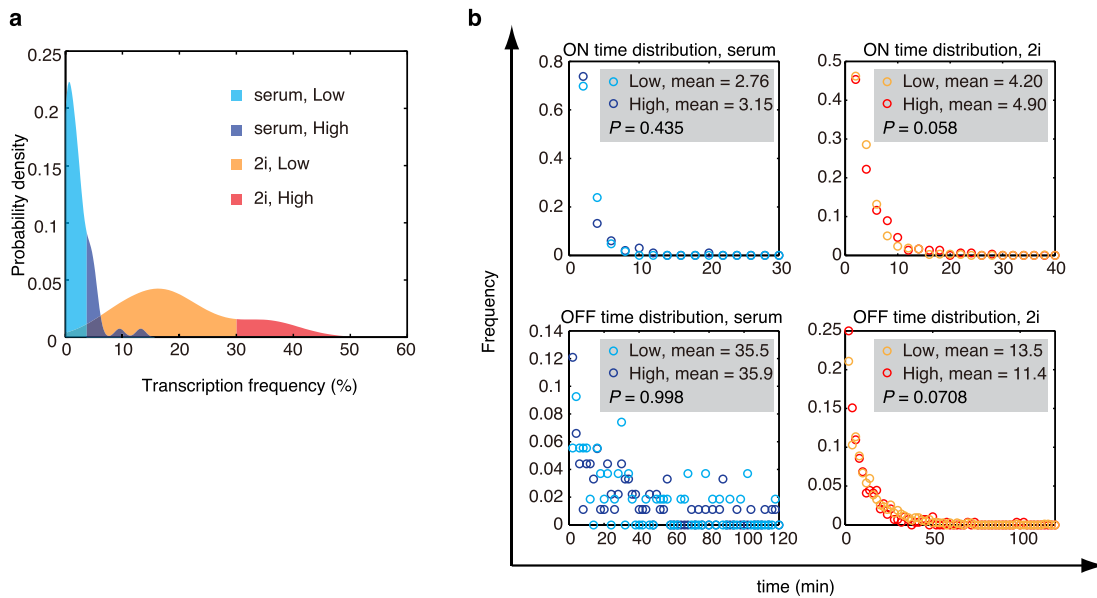

**Supplementary Figure S6, ON and OFF time for *Nanog* transcription is not significantly affected by differences in state.** (a) Probability density functions of transcription frequency over 4 hours in NM-G cells cultured in serum and 2i conditions (Figure 3c) are shown (see also Supplementary Figure S2). The functions are divided into two groups with higher or lower transcription frequencies relative to threshold values (3.75% and 30% for serum and 2i conditions, respectively). (b) Distributions of ON and OFF time for *Nanog* transcription in cells with higher or lower transcription frequencies. Mean values are displayed in each graph. Differences between the two groups within the same culture conditions were not significant ( $P > 0.05$ , two-sample Kolmogorov–Smirnov test).

mNanog-TALEN-L

MDYKDHGDYKDHIDYKDDDDKMAPKKRKRKVGIHGVPAAVDLRTLGYSSQQQEKI KPKVRSSTVAQHHEALVGHGFTHAHIVALSQHPAALGTVAV  
KYQDMI AALPEATHEAIVGVGKQWSGARALEALLTVAGELRGPPLQLDGTGQLLKI AKRGGVTAVEAVHAWRNALTGAPLNLTDPQVVAIASHDGGK  
QALETVQRLLPVLCQDHGLTPEQVVAIASNGGGKQALETVQRLLPVLCQAHGLTPDQVVAIASNNGGKQALETVQRLLPVLCQAHGLTPAQVVAIA  
SNGGGKQALETVQRLLPVLCQDHGLTPDQVVAIASNNGGKQALETVQRLLPVLCQDHGLTPEQVVAIASNIGGKQALETVQRLLPVLCQAHGLTPD  
QVVAIASHDGGKQALETVQRLLPVLCQAHGLTPAQVVAIASNGGGKQALETVQRLLPVLCQDHGLTPDQVVAIASHDGGKQALETVQRLLPVLCQD  
HGLTPEQVVAIASHDGGKQALETVQRLLPVLCQAHGLTPDQVVAIASNIGGKQALETVQRLLPVLCQAHGLTPAQVVAIASHDGGKQALETVQRLL  
PVLCQDHGLTPDQVVAIASHDGGKQALETVQRLLPVLCQDHGLTPEQVVAIASNIGGKQALETVQRLLPVLCQAHGLTPDQVVAIASNNGGKQALE  
TVQRLLPVLCQAHGLTPAQVVAIASNNGGKQALETVQRLLPVLCQAHGLTPEQVVAIASNGGGRPALESIVAQLSRPDPALAALTDNDHLVALACLG  
GRPALDAVKKGLPHAPALIKRTNRRIPERTSHRVAGSQLVKSELEEKSELRHKLKYPHEYIELIEIARNSTQDRILEMKVMEFFMKVYGYRGKH  
LGGSRKPDGAIYTVGSPIDYGVIVDTKAYSGGYNLP IQADEMERYVEENQTRDKHLNPNEWKVPSSVTEFKFLFVSGHFKGNYKQALTRLNHI  
TNCNGAVLSVEELLIGGEMIKAGTLTLEEVRRKFNNGEINFRS\*

mNanog-TALEN-R

MDYKDHGDYKDHIDYKDDDDKMAPKKRKRKVGIHGVPAAVDLRTLGYSSQQQEKI KPKVRSSTVAQHHEALVGHGFTHAHIVALSQHPAALGTVAV  
KYQDMI AALPEATHEAIVGVGKQWSGARALEALLTVAGELRGPPLQLDGTGQLLKI AKRGGVTAVEAVHAWRNALTGAPLNLTDPQVVAIASNGGGK  
QALETVQRLLPVLCQDHGLTPEQVVAIASNGGGKQALETVQRLLPVLCQAHGLTPDQVVAIASNIGGKQALETVQRLLPVLCQAHGLTPAQVVAIA  
SNIGGKQALETVQRLLPVLCQDHGLTPDQVVAIASNNGGKQALETVQRLLPVLCQDHGLTPEQVVAIASHDGGKQALETVQRLLPVLCQAHGLTPD  
QVVAIASHDGGKQALETVQRLLPVLCQAHGLTPAQVVAIASHDGGKQALETVQRLLPVLCQDHGLTPDQVVAIASNIGGKQALETVQRLLPVLCQD  
HGLTPEQVVAIASNNGGKQALETVQRLLPVLCQAHGLTPDQVVAIASNIGGKQALETVQRLLPVLCQAHGLTPAQVVAIASNNGGKQALETVQRLL  
PVLCQDHGLTPDQVVAIASNNGGKQALETVQRLLPVLCQAHGLTPEQVVAIASNNGGKQALETVQRLLPVLCQAHGLTPDQVVAIASNNGGKQALE  
TVQRLLPVLCQAHGLTPAQVVAIASNNGGKQALETVQRLLPVLCQAHGLTPEQVVAIASHDGGRPALESIVAQLSRPDPALAALTDNDHLVALACLG  
GRPALDAVKKGLPHAPALIKRTNRRIPERTSHRVAGSQLVKSELEEKSELRHKLKYPHEYIELIEIARNSTQDRILEMKVMEFFMKVYGYRGKH  
LGGSRKPDGAIYTVGSPIDYGVIVDTKAYSGGYNLP IQADEMQRVYKQENQTRNKHINPNNEWKVPSSVTEFKFLFVSGHFKGNYKQALTRLNRK  
TNCNGAVLSVEELLIGGEMIKAGTLTLEEVRRKFNNGEINFRS\*

**Supplementary Figure S6, Amino acid sequences of TALENs.**

The amino acid sequences of TALENs (mNanog-TALEN-L and mNanog-TALEN-R) used in this study are shown. Repeat variable diresidues (RVDs) are shown in red.



Supplementary Fig. S7, Nucleotide sequence of pTV-mNanog-PMS used in this study.

Restriction map of pTV-mNanog-PMS

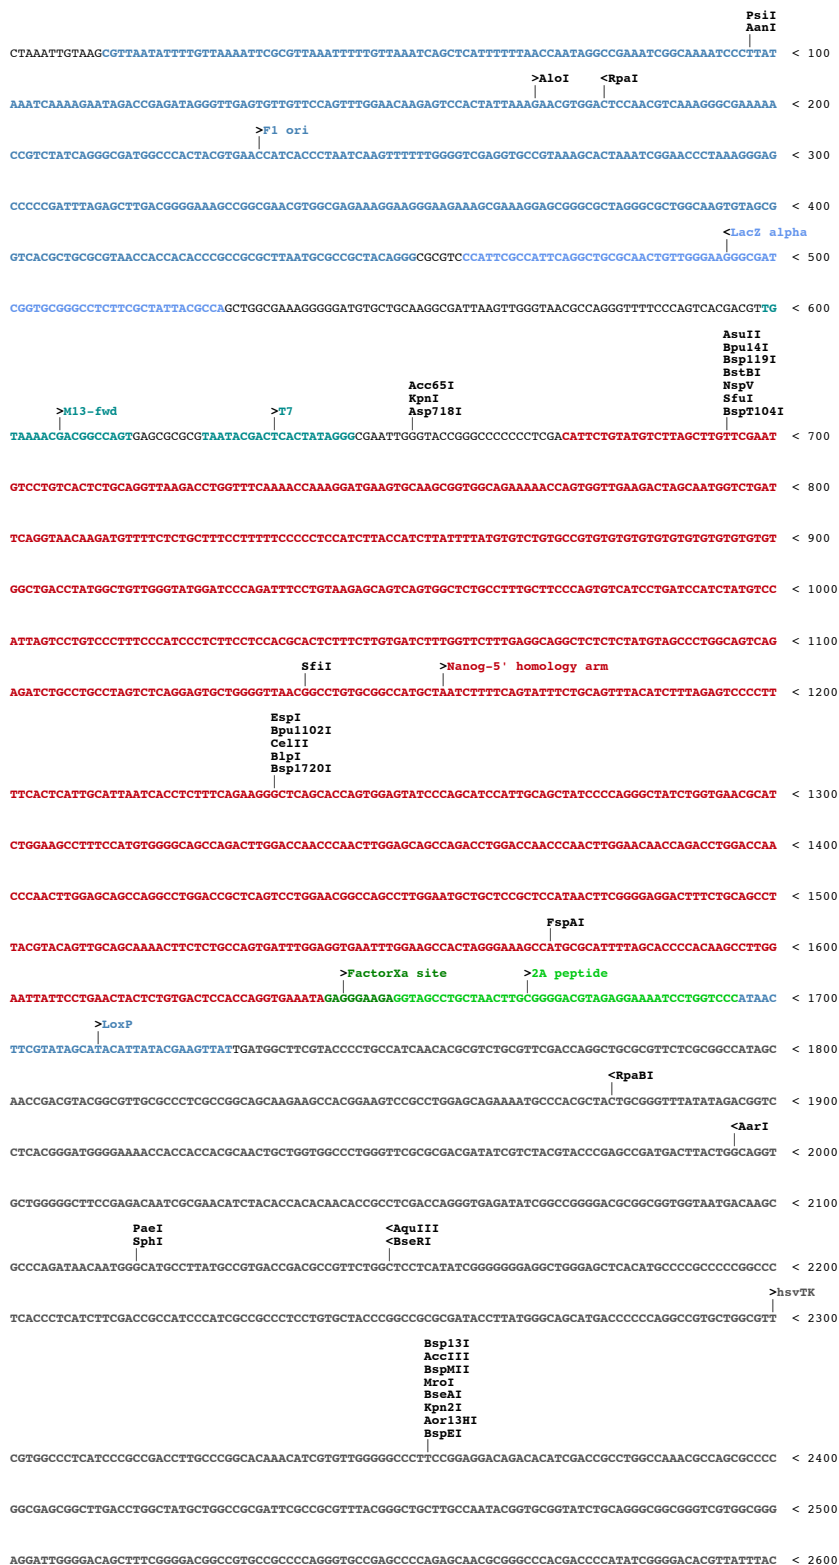

Supplementary Fig. S7, continued

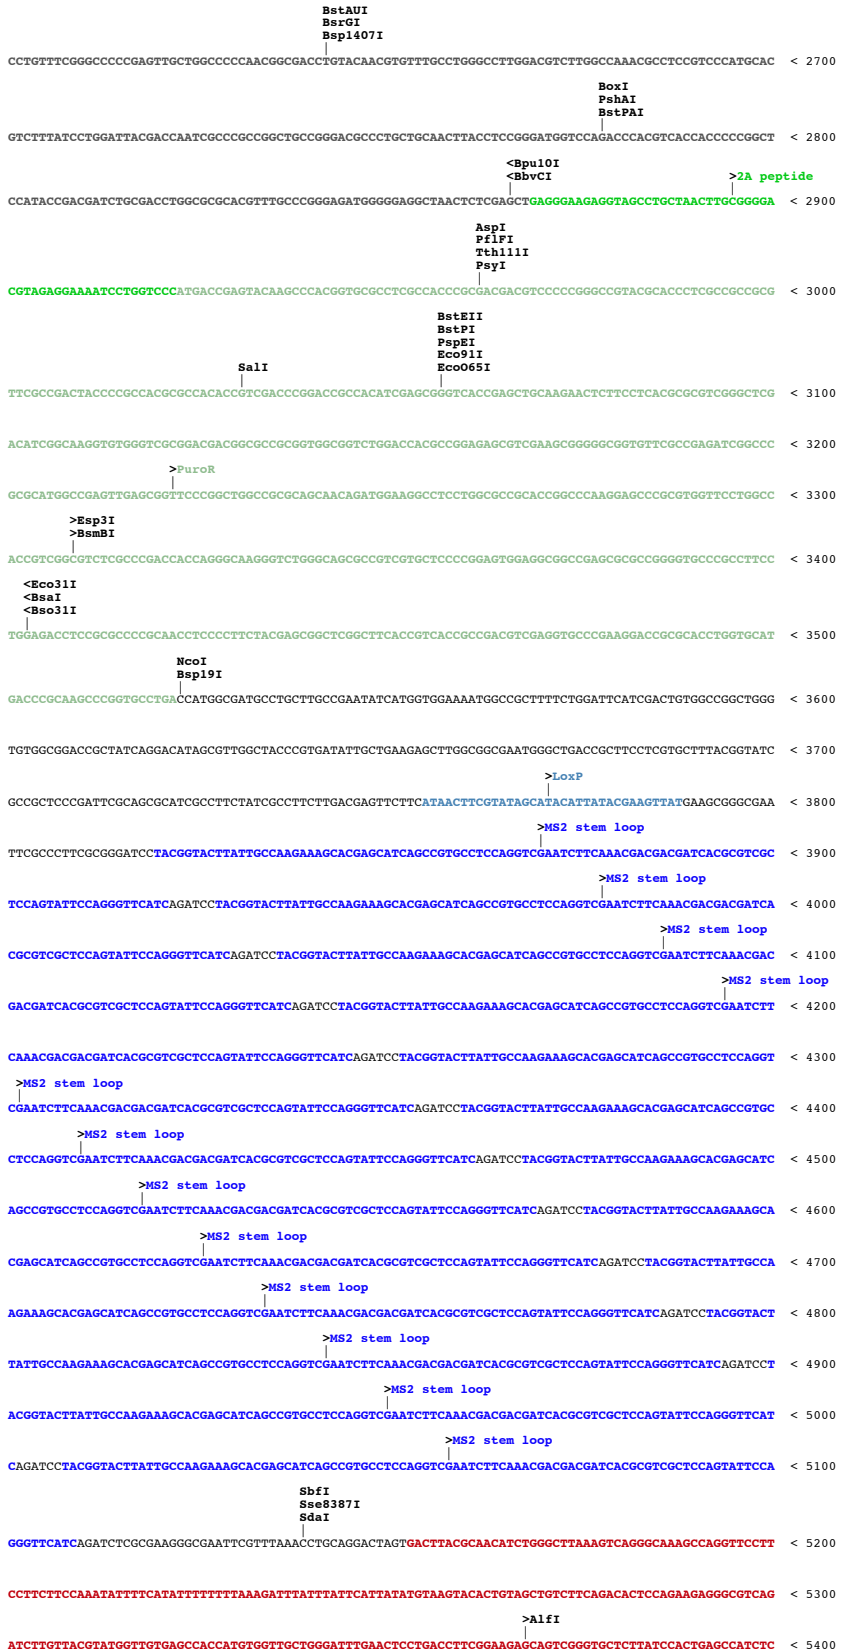

Supplementary Fig. S7, continued

ACCAGCCCTGGTTATTTTTTAAATTATTATGCTTTTGTATCAAGACAGGGTTCTCTGCATAGCTTAATTGTCTTTGAACAGCTCTGCAGA < 5500  
 CGACCTGGCCCTGAACCTCAGAGATCGCCCACTATCTTTGGCCCTGAATGCTGGGACCAAGGTGGCATAACCACACCTGGCATATATATGTT < 5600  
 AspA2I  
 AzeII  
 XmaJI  
 BlnI  
 ATTCTATTCTATTTTTATTTGGTCCAGAGCAAACTTAGGACTTAGAACATGCTGGGCCAACCTCAACTCTGAGCTCTATTACAACCTGGTGTGT < 5700  
 >Nanog-3' homology arm  
 AGTGTATTGTCTAGTCTGAATTTGCTTTTTTTAGTGTAACTCTAGGCTTTGGAGCAGTGAGGTGCATATACTCTCTCTCCCAAGAATAAGT < 5800  
 BstZ17I  
 BssNAI  
 Bst1107I  
 GCTTGAACACCCCTTACCCACGCCACCACCCATGCTAGTCTTTTTTCTTAGAAGCGTGGTCTTGGTATACACTGTGTCATTTTGAGGGGTGAGGTTA < 5900  
 AAGTATATACAAAGTATAACGATATGGTGGTACTCTCAGGATGAGACAGAAAGCAGAGGTTGAGGGTACTCAGATATGCAATAAGTTC AAGCC < 6000  
 HindIII  
 CAACCTGTACTATGTTAAATAGTAAAGCAGCATCTCGATAAAATAATAAACTAAAGTCTCAACAAAATAAAAGCTTCCACCTATTAAGTGTCTGCT < 6100  
 GTCCTTGGAGTCCCCAAGAGTAACTGCTATGTTAATATCTGTAGAAAGATGTTTATATTTGACTGTACCAIGATGAACCGATGCCAGTGGACTAGTTT < 6200  
 AAACAAAATAAACACTAATTTTACCTTTAGTGTCTTATCTTTTCCAGTGGGGTCAATATACTTTTTTATTTGGTATGTGAAGGGGAGGGCTTAAAC < 6300  
 AleI  
 OliI  
 <T3  
 <M13-rev  
 CGAGGCCGCCACCCGGTGGAGCTCCAGCTTTTGTTCCTTTAGTGGGGTAAATGCGCGCTTGGCGTAATCATGGTCTATAGCTGTTTCCCTGTGTA < 6400  
 <LacO  
 <lac  
 TTGTTATCCGCTCACAATTCACACACATCAGAGCGGAAGCATAAAGTGTAAAGCCTGGGGTGCCTAATGAGTGAGCTAACTCACATTAATTTGCGTTG < 6500  
 CGCTCACTGCCCTTTCCAGTCGGGAACCTGTCGTGCCAGTGCATTAATGAATCGGCCAACGCGGGGAGGAGCGGTTTGGCTATTGGCGCTCTT < 6600  
 CCGTCTTCCGCTCACTGACTCGCTGCGCTCGGTCGTTTCGGCTGCGGCGAGCGGTATCAGTCACTCAAAGCGGTAAATACGGTTATCCACAGAATCAGG < 6700  
 PciI  
 BspL111I  
 PscI  
 GGATAACGCAGAAAGAACATGTGAGCAAAAGGCCAGCAAAGGCCAGGAACCTAAAAAGGCCGGCTTGTCTGGCGTTTTCCATAGGCTCCGCCCCCT < 6800  
 GACGAGCATCAAAAATCGACGCTCAAGTCAGAGGTGGCGAACCAGCAGACTATAAGATACAGGCGTTTCCCCCTGGAAGCTCCCTCGTGGCT < 6900  
 CTCCTGTTCCGACCTCGCGCTTACCGGATACCTGTCGCTTTCTCCCTTCGGGAAGCGTGGCGCTTCTCATAGCTCACGCTGAGTATCTCAGTTC < 7000  
 <ColE1 origin  
 GGTGTAGTCTGCTCCCAAGCTGGGCTGTGTGACGAACCCCCCTTCAGCCGACCGCTGCGCTTATCCGTAACATCTGCTTGAAGTCCAACCCG < 7100  
 GTAAGACAGACTTATCGCCACTGGCAGCAGCCACTGTTAARAGGATTAGCAGAGCGAGGTATGTAGCGGTGCTCAGAGTCTTGAAGTGGTGCCTA < 7200  
 ACTACGGCTACACTAGAAGACAGTATTTGGTATCTGCGCTCTGTGAAGCCAGTTACTCTCGGAAAAGATTTGGTACTCTTATCCGCAACAAAC < 7300  
 CACCCTGTTAGCGGTGTTTTTTTTTTGTTGCAAGCAGAGATTACCGCAGAAAAAAGGATCTCAAGAAGATCCTTTGATCTTTTACCGGGGCTGAC < 7400  
 GCTCAGTGAACGAAAATCAGCTTAAGGGATTTGGTCAATGAGATTATCAAAAAGGATCTTCACCTAGATCCTTTTAAATTAATAATGAAGTTTAAAT < 7500  
 CAATCTAAAGTATATGAGTAACTTGGTCTGACAGTACCAATGCTTAATCAGTGAAGCACCCTATCTCAGCGATCTGCTATTTCCGCTCATCCATAGT < 7600  
 AspEI  
 BmeRI  
 Eam1105I  
 AhdI  
 DriI  
 TGCTGACTCCCCGCTGCTGATAGATACTACGATACGGGAGGGCTTACCATCTGGCCCCAGTCTGCAATGATACCGGGCTGCCACGCTCACCGCTCCA < 7700  
 GATTTATCAGCAATAAACAGCCAGCCGGAAGGGCGAGCGCAAGTGGTCTGCAACTTTATCCGCTCCATCCAGTCTATTAATTTGTCGGGGAAG < 7800  
 CTAGAGTAAGTAGTTCCGCGTTAATAGTTTGGCAACGTTGTTGCCATTGCTACAGGCATCGTGTGTACGCTGCTGTTTGGTATGGCTCATTTCAG < 7900  
 CTCGGTTCACACGATCAAGCGAGTTACATGATCCCCATGTTGTGCAAAAAGCGGTTAGCTCCTTCGGTCTCCGATCGTTGTCAGAGAATAGTTG < 8000  
 ScaI  
 ZrmI  
 AssI  
 BmcAI  
 GCCGAGTGTATCAGTATGGTATGCGAGCACTGCATAATCTCTTACTGTCATGCCATCCGTAAGATGCTTTTCTGTGACTGGTGAAGTACTCAACCA < 8100  
 AGTCATTCTGAGAATAGTGTATGCGGCGACGAGTTGCTCTTCCCGCGTCAATACGGGATAATACCGCGCACATAGCAGAATTTAAAAGTGTCTAT < 8200  
 CATTGGAAAACGTTCTTCGGGGCAAACTCTCAAGGATCTTACCGCTGTTGAGATCCAGTTCGATGTAACCCACTCGTGCACCACTGATCTTCAGCA < 8300

Supplementary Fig. S7, continued

```

TCFTTTTACTTTACACGCGTTTCTGGGTGAGCAAAAACAGGAAGCAAAATGCCGCAAAAAGGGAATAAGGGCGACACGGAATGTTGAATACTCATAC < 8400
                                                                                   |
                                                                                   v
                                                                                   <Amp prom
TCFTCCFTTTTCAATATATTATTGAAGCATTATCAGGGTTATTGTCTCATGAGCGGATACATATTTGAATGTATTAGAAAAATAAACAAATAGGGGTTCC < 8500

GCGCACATTTCCCGAAAAGTGCCAC < 8526

```

Features :

|                       |   |                     |
|-----------------------|---|---------------------|
| T3                    | : | [6355 : 6336 - CCW] |
| M13-fwd               | : | [599 : 616 - CW]    |
| M13-rev               | : | [6393 : 6373 - CCW] |
| IT                    | : | [626 : 645 - CW]    |
| ColE1 origin          | : | [7389 : 6761 - CCW] |
| F1 ori                | : | [13 : 453 - CW]     |
| LacZ alpha            | : | [528 : 460 - CCW]   |
| LacO                  | : | [6421 : 6399 - CCW] |
| PuroR                 | : | [2923 : 3522 - CW]  |
| LoxP                  | : | [1696 : 1729 - CW]  |
| LoxP                  | : | [3755 : 3788 - CW]  |
| Amp prom              | : | [8468 : 8440 - CCW] |
| lac                   | : | [6455 : 6426 - CCW] |
| MS2 stem loop         | : | [3820 : 3921 - CW]  |
| MS2 stem loop         | : | [3928 : 4029 - CW]  |
| MS2 stem loop         | : | [4036 : 4137 - CW]  |
| MS2 stem loop         | : | [4144 : 4245 - CW]  |
| MS2 stem loop         | : | [4252 : 4353 - CW]  |
| MS2 stem loop         | : | [4360 : 4461 - CW]  |
| MS2 stem loop         | : | [4468 : 4569 - CW]  |
| MS2 stem loop         | : | [4576 : 4677 - CW]  |
| MS2 stem loop         | : | [4684 : 4785 - CW]  |
| MS2 stem loop         | : | [4792 : 4893 - CW]  |
| MS2 stem loop         | : | [4900 : 5001 - CW]  |
| MS2 stem loop         | : | [5008 : 5109 - CW]  |
| 2A peptide            | : | [1642 : 1695 - CW]  |
| 2A peptide            | : | [2869 : 2922 - CW]  |
| hsvTK                 | : | [1732 : 2868 - CW]  |
| FactorXa site         | : | [1639 : 1650 - CW]  |
| Nanog-5' homology arm | : | [673 : 1641 - CW]   |
| Nanog-3' homology arm | : | [5153 : 6305 - CW]  |

Supplementary Fig. S8 Nucleotide sequence of pTV-mNanog-HPP used in this study.

Restriction map of pTV-mNanog-HPP

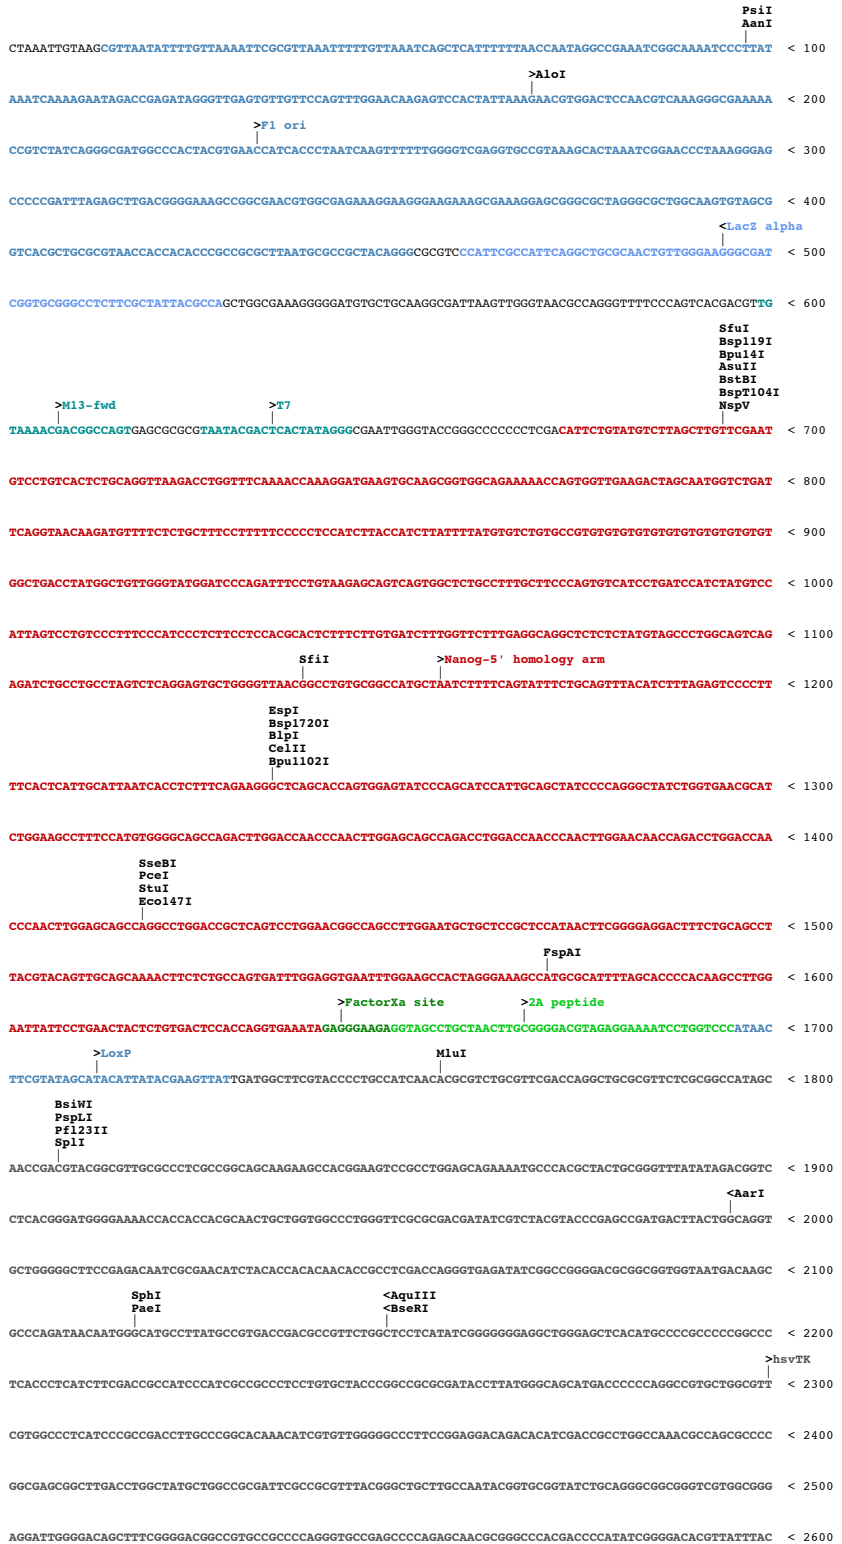

Supplementary Fig. S8, continued

Bsp1407I  
BsrGI  
BstAUI

CCTGTTTCGGGCCCCGAGTTGTCTGGCCCCAACGGCGACCTGTACAACGTGTTGCTCTGGCCCTTGAGCGCTCTGGCCAAACGCCTCCGTCCTCATGCAC < 2700

GTCTTTATCTCGATTTACGACCAATCCGCCCGCCGGCTGCCGGGACGCCCTGCTGCAACTTACCTCCGGGATGGTCAGACCCACGTCACCACCCCGGGCT < 2800

<Bpu10I  
<BbvCI >2A peptide

CCATACCAGCATCTGCGACCTGGCGCGACGTTTCCCGGGAGATGGGGGAGGCTAACTCTCGAGCTGAGGGAAGAGGTAGCCTGCTAACTTGGGGGA < 2900

>Esp3I  
>BsmBI

CGTAGAGGAAATCTTGGTCCATGAAAAGCCCTGAACTCACCGGCAGCTCTGTGAGAAAGTTTCTGATCGAAAAGTTCGACAGCGCTCCCGACCTGATG < 3000

CAGCTCTCGGAGGGCGAAGAAATCTCGTCTTTCAGCTTCGATGTAGGAGGGCTGGATATGCTCTCGGGTAAATAGCTCGCCGATGGTTTCTACAAG < 3100

ATCGTTATGTTTATCGGCATTGTGATCGGCCGCGCTCCCGATTCCGGAAAGTCTTGACATGGGGAAATCAGCGAGAGCTGACCTATTGCATCTCCCG < 3200

AsiSI  
RgaI  
SgfI  
SfaAI

Bsp19I  
NcoI

CCGTGCACAGGGTCTCAGCTTGCAGACCTGCCTGAAACGAACTGCCCGTGTCTCGAGCCGGTCGCGAGGCACTGATGTCGATCGCTGCGGCCGAT < 3300

CpoI  
CspI  
RsrII  
Rsr2I

CTTAGCCAGACGAGCGGGTTCGGCCATTCCGACCGCAAGGAATCGGTCAATACACTACATGGCGTGAATTCATATGCGCGAATGCTGATCCCCATGT < 3400

>HygR

ATCAGTGGCAACTGTGATGGACGACACCGCTCAGTCCCTCGCGAGGCTCTCGATGAGCTGATGCTTTGGGCGAGGACTGCCCGAAGTCCGGCA < 3500

>MaeI

CCTCGTGCAGCGGATTTCCGGTCCAACAATGCTCTGACGGCAATGGCCGCATAACAGCGGTCAATGACTGGAGCGAGGCGATGTTCCGGGATTCCTCA < 3600

<AjuI

TACGAGTTCGCAACATCTTCTTCTGAGGGCGGTGTGGCTGTATGGAGCAGCAGCGCTACTTCGAGCGGAGCATCCGGAGCTTCAGGATCGC < 3700

CGCGCTCCGGCGTATATGCTCCGATTTGGCTTGACCACTCTATCAGAGCTGGTTGACGCAATTCGATGATGCAAGTTGGGCGCAGGTCGATG < 3800

CGAGCAATCGTCGATCCGGAGCCGGACTGTCCGGCGTACACAATCCGCCGAGAAGCGCGCCGCTGAGCCGATGGCTGTAGAAAGTACTCGCC < 3900

>LoxP

GATAGTGAAACCGAGCCCGCAGCATCTCCGAGGGCAAAGAAATACTTCGTATAGCATACTATACGAAGTTATGAGGTTTAAACGAATCTCGCA < 4000

>PP7 stem loop

GSTTTAACGAATTCGCCCTTCGCGGATCTAAGGTACCTAATGCCTAGAAAGGAGCAGACGATATGGCTCGCTCCCTCAGGTGCAGCTAGAAAC < 4100

>PP7 stem loop

CAGCAGCATATGGCTCGCTGGTGCAGTATTCGGGTTCAATAGATCCCTAAGGTACCTAATGCCTAGAAAGGAGCAGACGATATGGCTCGCTCC < 4200

>PP7 stem loop

CTGCAGTGCAGCTAGAAACCGACAGCATATGGCTCGCTGGTGCAGTATTCGGGTTCAATAGATCCCTAAGGTACCTAATGCCTAGAAAGGAG < 4300

>PP7 stem loop

CAGACGATATGGCTCGCTCCCTGCAGGTGCAGCTAGAAACCGACAGCATATGGCTCGCTGGTGCAGTATTCGGGTTCAATAGATCCCTAAGGT < 4400

>PP7 stem loop

ACCTAATGCCTAGAAAGGAGCAGACGATATGGCTCGCTCCCTGCAGGTGCAGCTAGAAACCGACAGCATATGGCTCGCTGGTGCAGTATTC < 4500

>PP7 stem loop

GGGTTCAATAGATCCCTAAGGTACCTAATGCCTAGAAAGGAGCAGACGATATGGCTCGCTCCCTGCAGGTGCAGCTAGAAACCGACAGCATATGG < 4600

>PP7 stem loop

CTCGTGGCTGCAGTATTCGGGTTCAATAGATCCCTAAGGTACCTAATGCCTAGAAAGGAGCAGACGATATGGCTCGCTCCCTGCAGGTGCAGCTA < 4700

GAACCGACAGCATATGGCTCGCTGGTGCAGTATTCGGGTTCAATAGATCCCTAAGGTACCTAATGCCTAGAAAGGAGCAGACGATATGGCTC < 4800

>PP7 stem loop

GCTCCCTGCAGTGCAGCTAGAAACCGACAGCATATGGCTCGCTGGTGCAGTATTCGGGTTCAATAGATCCCTAAGGTACCTAATGCCTAGAA < 4900

>PP7 stem loop

AGGAGCAGCATATGGCTCGCTCCCTGCAGGTGCAGCTAGAAACCGACAGCATATGGCTCGCTGGTGCAGTATTCGGGTTCAATAGATCC < 5000

>PP7 stem loop

AAGGTACCTAATGCCTAGAAAGGAGCAGACGATATGGCTCGCTCCCTGCAGGTGCAGCTAGAAACCGACAGCATATGGCTCGCTGGTGCAGT < 5100

>PP7 stem loop

TTCCGGGTTCAATAGATCCCTAAGGTACCTAATGCCTAGAAAGGAGCAGACGATATGGCTCGCTCCCTGCAGGTGCAGCTAGAAACCGACAGCAT < 5200

>PP7 stem loop

ATGGCTCGCTGGTGCAGTATTCGGGTTCAATAGATCCCTAAGGTACCTAATGCCTAGAAAGGAGCAGACGATATGGCTCGCTCCCTGCAGGTGCA < 5300

CTTAGAAACCGACAGCATATGGCTCGCTGGTGCAGTATTCGGGTTCAATAGATCCCTAAGGTACCTAATGCCTAGAAAGGAGCAGACGATATG < 5400

>PP7 stem loop

CGCTCGCTCCCTGCAGGTGCAGCTAGAAACCGACAGCATATGGCTCGCTGGTGCAGTATTCGGGTTCAATAGATCTCGCAAGGGCGAATTCG < 5500

CciNI  
NotI

CGGCCGTAGACTTACGCAACATCTGGGCTTAAAGTCAGGGCAAAGCCAGGTTCTCTCTCTCCAAATATTTTTCATATTTTTTAAAGATTATTTA < 5600

Supplementary Fig. S8, continued

TTCATTATATGTAAGTACACTGTAGCTGTCTTCAGACACTCCAGAAGAGGGCGTCAGATCTTGTACGTATGTTGTGAGCCACCATTGTGGTCTGGGA < 5700  
|  
>AlfI  
TTTGAACCTCTGACCTTCGGAAGAGCAGTCGGGTGCTCTTATCCAAGTCCACCCAGCCCTGGTTATTTTTTAATTATTATTGCTTTTTTG < 5800  
TTATCAAGCAGGGTTTCTCTGCATAGCTTAATTGTCTTTGAACTAGCTCTGCAGACCAGCTGGCTTGAACCTCAGAGACTGCCCACTATCTTTGC < 5900  
|  
<TstI | AspA2I  
| XmaI  
| AseI  
| BlnI  
CTCTGAAATGCTGGGCCAAAGGGTGCATACACCACACCTGGCATTATATTTGTTTATTTCTATTCTATTTTTATTGTCAGAGCAAACTAGGAC < 6000  
TTAGAACATGCTGGGCCAACCACTCAACTCTGAGCTCTATTACAACTTGGTGTGTAGTATTGTCTTAGTCTGAATTTGCTTTTTTTAGTGT < 6100  
>Nanog-3' homology arm  
AACTTAGCTTTTGAGACAGTGAAGTGCATATACTCTCTCTCCCAAGAATAAGTCTGTGAACACCCTTACCACGCCACCACCACCATGCTAGTCTT < 6200  
|  
BssNAI  
| Bst1107I  
| Bst217I  
TTTTCTTAGAAGCGTGGTCTTGTTATACACTGTCTATTTTGAGGGGTGAGGTTAAAAGTATATACAAGTATAAGCATATGGTGGCTACTCTCGAGG < 6300  
ATGAGACAGAAGGACCAGGAGTTGAGGGTAGCTCAGATATGCAATAAGTCAAGGCCAACCTGACTATGTTAAATAGTAGAGCAGCATCTCGATAAA < 6400  
HindIII  
ATAATAAACTAAAGTCTCAACAAAATAAAGCTTTCACCTATTAAAGTCTGCTTGTCTCTTGGAGTCCCCCAAGAGTAACTGCTATGTTAATATCTGT < 6500  
|  
BcuI  
| SpeI  
| AhiI  
AGAAAGATGTTTATATTGACTGTACATGATGAACCGATGCCAGCTGGACTAGTTTAAACAAAATAAAACATAATTTACCTTTAGTGGCTTATCTT < 6600  
|  
OliI  
| AseI  
TTGCTCAGTGGGGTCAATATACTTTTTTATTTGGTATGTGAAGGGGAGGGTCTTAACCGAGGCCGCCACCCGGTGGAGCTCCAGCTTTTGTCCCTTAA < 6700  
<T3 | <M13-rev | <LacO | <Lac  
GTGAGGGTTAAATGCGCGCTTGGCGTAATCATGGTCATAGCTTTTCCCTGTGTGAATTTGTTATCCCGTCAACAATCCACACAACATACGAGCCGGGAAC < 6800  
ATAAAGTGTAAAGCCTGGGGTGCCTAATGAGTGAAGTAACTACACATTAATTGCGTTGCGCTCACTGCCCGCTTCCAGTCGGGAAACCTGTCGTCCAGC < 6900  
TGCATTAATGAATCGGCCAACGCCGGGGAGGAGCGGTTGCGTATTGGCGCTCTCCGCTTCCCTCGCTCACTGACTCGTCGCTCGCTCGTTCGGCT < 7000  
|  
BspLU11  
| PciI  
| PscI  
CGGCGAGCGGTATCAGCTCACTCAAAGCGGTAATACGGTTATCCACAGAATCAGGGGATAACGCAGGAAACATGTGAGCAAAGGCCAGCAAAG < 7100  
GCCAGAACCGTAAAAAGCCCGGTTGCTGGCGTTTTTCCATAGGCTCCGCCCCCTGACGAGCATCAAAAATCGACGCTCAAGTCAGAGTGGCGAA < 7200  
ACCCGACAGACTATAAAGATACAGCGGTTTTCCCCCTGGAAGCTCCCTCGTGGCTCTCCTGTCCGACCTCGCGCTTACCAGGATACCTGCTCCGCTT < 7300  
TCTCCCTTCGGGAAGCGTGGCGCTTTCATAGCTCAGCTGTAGGTATCTCAGTTCGGTGTAGTCTGCTCGCTCAAGCTGGGCTGTGTGACGAAACC < 7400  
<ColE1 origin  
CCCGTTCAGCCCGACCGTCTGCGCTTATCCGGTAACTATCGTCTTGAGTCCAACCCGGTAAGACACGACTTATCGCCACTGGCAGCAGCCACTGGTAACA < 7500  
GGATTAGCAGAGCGAGTATGTAGGCGGTCTACAGAGTCTTGAAGTGGTGGCCTAACTACGGCTACACTAGAAGGACAGTATTGGTATCTGCGCTCT < 7600  
CGTGAAGCCAGTTACCTTCGAAAAAGAGTTGGTAGCTTTGATCCGGCAAACAACCAGCTGGTAGCGGTGTTTTTTTTGTTGTCAGACAGCAGATT < 7700  
ACGCGCAGAAAAAGGATCTCAAGAAGATCTTTGATCTTTCTACGCGGTCGACGCTCAGTGAACGAAAACCTCAGCTTAAGGGATTTTGTGTCATGA < 7800  
GATTATCAAAAAGGATCTTCACTAGATCCTTTTAAATTAATAATGAAGTTTTAAATCAATCTAAAGTATATATGATTAACCTGGTCTGACAGTTACCA < 7900  
|  
BmeRI  
| Eam1105I  
| DriI  
| AspEI  
| AhdI  
ATGCTTAATCAGTGAAGCACTATCTCAGCGATCTGTCTATTTGTTTCATCCATAGTTCGCTGACTCCCCCTCGTGTAGATAACTACGATACGGGAGGCG < 8000  
TTACCATCTGGCCCGAGTCTGCAATGATACCGCGCTGCCACGCTCACCGGCTCCAGATTTATCAGCAATAAACCCAGCCAGCCGGAAGGCCGAGCGCA < 8100  
GAAGTGTCTGCAACTTTATCCCGCTCCATCCAGTCTATTAATTTGTTGCCGGAAGCTAGAGTAAAGTGTCCGCAAGTAAAGTTGCGCAACGTTGT < 8200  
TGCCATTGCTACAGGCATCGTGGTGTACGCTGCTGTTGTTGATGGCTTATTACGCTCCGGTCCCAACGATCAAGCGAGGTTACATGATCCCCCATG < 8300  
TTGTGCAAAAAGCGGTTAGCTCCTTCGGTCTCCGATCGTGTGTCAGAAGTAAAGTGGCCGAGTGTATCACTCATGTTATGGCAGCATGCAATAAT < 8400  
CTCTACTGTCTACGCCATCGTAAGATGCTTTTCTGTGACTGTGAGTACTCAACCAAGTCAATTTCTGAGAATAGTGTATCGCGGACCGAGTGTCTCTTG < 8500

Supplementary Fig. S8, continued

```

CCCGGGCTCAATACGGGATAATACCGGCCACATAGCAGAACTTTAAAAGTGCTCATCATTGGAAAAAGCTTCTCGGGCGAAAACTCTCAAGGATCTTA < 8600

CCGCTGTGTGAGATCCAGTTCGATGTAACCCACTCGTGCACCCAACCTGATCTTCAGCATCTTTTACTTACCACGCGTTCCTGGGTGAGCAAAAAACAGGAA < 8700

GGCAAAATGCCCAAAAAAGGGAATAAGGGCGACACGGAAATGTTGAATACTCATACTCTTCCTTTTTCAATATTATTGAAGCATTATATCAGGGTTATTG < 8800

      <Amp prom
TCTCATGAGCGGATACATATTTGAATGTATTAGAAAAATAAACAAATAGGGGTTCCGCGCACATTTCCCGAAAAAGTGCCAC < 8883

```

```

Features :
T3 : [6712 : 6693 - CW]
M13-fwd : [599 : 616 - CW]
M13-rev : [6750 : 6730 - CW]
T7 : [626 : 645 - CW]
ColE1 origin : [7746 : 7118 - CCW]
F1 ori : [13 : 453 - CW]
LacZ alpha : [528 : 460 - CCW]
LacO : [6778 : 6756 - CCW]
LoxP : [1696 : 1729 - CW]
LoxP : [3946 : 3979 - CW]
Amp prom : [8825 : 8797 - CCW]
lac : [6812 : 6783 - CCW]
PP7 stem loop : [4032 : 4146 - CW]
PP7 stem loop : [4153 : 4267 - CW]
PP7 stem loop : [4274 : 4388 - CW]
PP7 stem loop : [4395 : 4509 - CW]
PP7 stem loop : [4516 : 4630 - CW]
PP7 stem loop : [4637 : 4751 - CW]
PP7 stem loop : [4758 : 4872 - CW]
PP7 stem loop : [4879 : 4993 - CW]
PP7 stem loop : [5000 : 5114 - CW]
PP7 stem loop : [5121 : 5235 - CW]
PP7 stem loop : [5242 : 5356 - CW]
PP7 stem loop : [5363 : 5477 - CW]
2A peptide : [1642 : 1695 - CW]
2A peptide : [2869 : 2922 - CW]
hsvTK : [1732 : 2868 - CW]
HygR : [2923 : 3978 - CW]
FactorXa site : [1639 : 1650 - CW]
Nanog-5' homology arm : [673 : 1641 - CW]
Nanog-3' homology arm : [5509 : 6662 - CW]

```



**Supplementary Table S1, Concentrations of chemical inhibitors.**

|                 | Concentrations of inhibitors ( $\mu\text{M}$ ) |           | mean # of mRNA | Intrinsic noise | 95% CI |
|-----------------|------------------------------------------------|-----------|----------------|-----------------|--------|
|                 | PD0325901                                      | CHIR99021 |                |                 |        |
| Serum condition | 0                                              | 0         | 35.915         | 0.606           | 0.350  |
| 2i              | 0.2                                            | 0.6       | 146.620        | 0.316           | 0.079  |
|                 | 0.5                                            | 1.5       | 217.626        | 0.218           | 0.060  |
|                 | 0.75                                           | 2.25      | 151.372        | 0.246           | 0.059  |
|                 | 1                                              | 3         | 238.511        | 0.128           | 0.020  |
| PD0325901       | 0.2                                            | 0         | 93.616         | 0.337           | 0.145  |
|                 | 0.5                                            | 0         | 211.453        | 0.196           | 0.050  |
|                 | 0.75                                           | 0         | 308.127        | 0.112           | 0.025  |
|                 | 1                                              | 0         | 319.824        | 0.126           | 0.026  |

**Supplementary Table S2, Nucleotide sequences of smFISH probes used in this study.**

| <b><i>Nanog</i> intronic probes</b> |                                         | <b>Dye: CAL Fluor Red 590</b> |
|-------------------------------------|-----------------------------------------|-------------------------------|
| <b>Probe #</b>                      | <b>Probe (5'→ 3')</b>                   |                               |
| 1                                   | T T A C T G G G T T C T T C G G G G A C |                               |
| 2                                   | T T T T T T C T A C T C T T A C C C T A |                               |
| 3                                   | A G A A G C A A T A A C C C T T C A G C |                               |
| 4                                   | C C C G C T T A T G T T A A T G A C T A |                               |
| 5                                   | G G G T T T C C A G A A G A G T G A T A |                               |
| 6                                   | C A G A C T A G A A G G C C A A C G T A |                               |
| 7                                   | T T A T A T T G C T C C G T C C T G T G |                               |
| 8                                   | T A G G A T G T T A G G T C T C C C T G |                               |
| 9                                   | A A A T G G G G T G C T C A T T C C A A |                               |
| 10                                  | C T A A C T G T A T A A C C T C A C C A |                               |
| 11                                  | A A A C G G C C A T T T G G G C A A A T |                               |
| 12                                  | A A T G C T A A C T G C T T C T G C T G |                               |
| 13                                  | T A A G T G A C A T C C A T A T T C C C |                               |
| 14                                  | T G A G C T C A C A A A C C C A G A A C |                               |
| 15                                  | C T C C A G A T G C T A G C T A T A A G |                               |
| 16                                  | A G A C A A T G A G C T T C A G A C C T |                               |

| <b><i>Nanog</i> exonic probes</b> |                                         | <b>Dye: CAL Fluor Red 590</b> |
|-----------------------------------|-----------------------------------------|-------------------------------|
| <b>Probe #</b>                    | <b>Probe (5'→ 3')</b>                   |                               |
| 1                                 | A G G T T T T A G G C A A C A A C C A A |                               |
| 2                                 | A T G G C G A G G G A A G G G A T T T C |                               |
| 3                                 | A A C T A G G C A A A C T G T G G G G A |                               |
| 4                                 | T T C C C A G A A T T C G A T G C T T C |                               |
| 5                                 | A A C T G C A G G C A T T G A T G A G G |                               |
| 6                                 | A G C A A G A A T A G T T C T C G G G A |                               |
| 7                                 | A G A G C A T C T C A G T A G C A G A C |                               |
| 8                                 | T T C A G A G G A A G G G C G A G G A G |                               |
| 9                                 | G A A T C A G G G C T G C C T T G A A G |                               |
| 10                                | C T T T T G T T T G G G A C T G G T A G |                               |
| 11                                | T G T C A G C C T C A G G A C T T G A G |                               |
| 12                                | T G A G A G A A C A C A G T C C G C A T |                               |
| 13                                | C T G T C C T T G A G T G C A C A C A G |                               |
| 14                                | G A G G T A C T T C T G C T T C T G A A |                               |
| 15                                | G A G A G T T C T T G C A T C T G C T G |                               |
| 16                                | A T A G C T C A G G T T C A G A A T G G |                               |
| 17                                | G A A A C C A G G T C T T A A C C T G C |                               |
| 18                                | T T G C A C T T C A T C C T T T G G T T |                               |
| 19                                | T C T T C A A C C A C T G G T T T T T C |                               |
| 20                                | T T C T G A A T C A G A C C A T T G C T |                               |

|    |                       |
|----|-----------------------|
| 21 | GATACTCCACTGGTGCTGAG  |
| 22 | GGGGATAGCTGCAATGGATG  |
| 23 | ACATGGAAAGGCTTCCAGAT  |
| 24 | AAGTTGGGTTGGTCCAAGTC  |
| 25 | AGGTCTGGTTGTTCCAAGTT  |
| 26 | GAAGTTATGGAGCGGAGCAG  |
| 27 | CTGTACGTAAGGCTGCAGAA  |
| 28 | CTGGCAGAGAAGTTTTGCTG  |
| 29 | CTTCAAATTCACCTCCAAA   |
| 30 | TAAAATGCGCATGGCTTTCC  |
| 31 | ATAATCCAAGGCTTGTGGG   |
| 32 | GTAAGTCTCATATTTACCT   |
| 33 | TGACTTTAAGCCCAGATGTT  |
| 34 | CATGTTCTAAGTCTAGGTT   |
| 35 | AGCTCAGAAGTTGAGTTGGT  |
| 36 | ACACTAACACACCAAGTTGT  |
| 37 | TCTCAAAGCCTAGAGTTAA   |
| 38 | GAGAGAGTATATGCACCTCA  |
| 39 | GGTGTTC AAGCACTTATTCT |
| 40 | AGACCCACGCTTCTAAGAAA  |
| 41 | AAACCTCACCCCTCAAAATG  |
| 42 | CCACCATATCGTTATACTTT  |
| 43 | TTCTGTCTCATCCTCGAGAG  |
| 44 | TATCTGAGCTACCCTCAAAC  |
| 45 | CGAGATGCTGTCTTACTATT  |
| 46 | GCAAGCACCTTAATAGGTGA  |
| 47 | ACATAGCAGTTACTCTTGGG  |
| 48 | ATCGGTTTCATCATGGTACAG |

| <b>MS2 probes*</b> |                           | <b>Dye: Cy5</b> |
|--------------------|---------------------------|-----------------|
| <b>Probe #</b>     | <b>Probe (5'-&gt; 3')</b> |                 |
| 1                  | TTTCTTGGCAATAAGTACCGTA    |                 |
| 2                  | TTTGAAGATTCGACCTGGAG      |                 |
| 3                  | GATGAACCCTGGAATACTGGAG    |                 |

\*each probe is labeled at both ends

| <b>PP7 probes*</b> |                           | <b>Dye: Cy3</b> |
|--------------------|---------------------------|-----------------|
| <b>Probe #</b>     | <b>Probe (5'-&gt; 3')</b> |                 |
| 1                  | TTCTAGGCAATTAGGTACCTTA    |                 |
| 2                  | TTTCTAGAGTCGACCTGCAG      |                 |
| 3                  | AATGAACCCGGAATACTGCAG     |                 |

\*each probe is labeled at both ends

**Supplementary Video S1, Live imaging of NM-G cells cultured in serum condition.**

NM-G cells cultured in serum condition were subjected to live imaging with a spinning-disc confocal microscope at 2-min intervals for 4 h. Z series of 41 focal planes with a step size of 0.25  $\mu\text{m}$  were acquired. Maximum-intensity image projections are shown. Scale bar, 10  $\mu\text{m}$ .

**Supplementary Video S2, Live imaging of NM-G cells cultured in 2i condition.**

NM-G cells cultured in 2i condition were subjected to live imaging with a spinning-disc confocal microscope at 2-min intervals for 4 h. Z series of 41 focal planes with a step size of 0.25  $\mu\text{m}$  were acquired. Maximum-intensity image projections are shown. Scale bar, 10  $\mu\text{m}$ .

**Supplementary Video S3, Simultaneous visualization of individual mRNA molecules and transcription site in the NM-G cell line.**

NM-G cells cultured in 2i conditions were subjected to live imaging with a spinning-disc confocal microscope using a 100 $\times$  objective. Z series of 3 focal planes with a step size of 0.15  $\mu\text{m}$  were continuously acquired at minimum intervals with 30-ms exposure time for about 2.5 s. The approximated collection time is indicated. Maximum-intensity image projections are shown. Scale bar, 5  $\mu\text{m}$ .
